Basic science for the clinician

# Update on acute coronary syndromes: the pathologists' view

Erling Falk<sup>1</sup>, Masataka Nakano<sup>2</sup>, Jacob Fog Bentzon<sup>1</sup>, Alope V. Finn<sup>3</sup>, and Renu Virmani<sup>2\*</sup>

<sup>1</sup>Aarhus University Hospital Skejby, Aarhus, Denmark; <sup>2</sup>CVPath Institute Inc., 19 Firstfield Road, Gaithersburg, MD 20878, USA; and <sup>3</sup>Emory University Hospital, Atlanta, GA, USA

Received 7 August 2012; revised 1 October 2012; accepted 9 November 2012; online publish-ahead-of-print 13 December 2012

Although mortality rates from coronary heart disease in the western countries have declined in the last few decades, morbidity caused by this disease is increasing and a substantial number of patients still suffer acute coronary syndrome (ACS) and sudden cardiac death. Acute coronary syndrome occurs as a result of myocardial ischaemia and its manifestations include acute myocardial infarction and unstable angina. Culprit plaque morphology in these patients varies from thrombosis with or without coronary occlusion to sudden narrowing of the lumen from intraplaque haemorrhage. The coronary artery plaque morphologies primarily responsible for thrombosis are plaque rupture, and plaque erosion, with plaque rupture being the most common cause of acute myocardial infarction, especially in men. Autopsy data demonstrate that women <50 years of age more frequently have erosion, whereas in older women, the frequency of rupture increases with each decade. Ruptured plaques are associated with positive (expansive) remodelling and characterized by a large necrotic core and a thin fibrous cap that is disrupted and infiltrated by foamy macrophages. Plaque erosion lesions are often negatively remodelled with the plaque itself being rich in smooth muscle cells and proteoglycans with minimal to absence of inflammation. Plaque haemorrhage may expand the plaque rapidly, leading to the development of unstable angina. Plaque haemorrhage may occur from plaque rupture (fissure) or from neovascularization (angiogenesis). Atherosclerosis is now recognized as an inflammatory disease with macrophages and T-lymphocytes playing a dominant role. Recently at least two subtypes of macrophages have been identified. M1 is a pro-inflammatory macrophage while M2 seems to play a role in dampening inflammation and promoting tissue repair. A third type of macrophage, termed by us as haemoglobin associated macrophage or M(Hb) which is observed at site of haemorrhage also can be demonstrated in human atherosclerosis. In order to further our understanding of the specific biological events which trigger plaque instability and as well as to monitor the effects of novel anti-atherosclerotic therapies newer imaging modalities *in vivo* are needed.

## Keywords

Acute coronary syndrome • Plaque rupture • Plaque erosion • Calcified nodule • Vulnerable plaque

## Introduction

For the past decades, the mortality of coronary heart disease (CHD) has declined substantially in many affluent countries.<sup>1</sup> Previously, myocardial infarction (MI) was a disease with a dire short-term prognosis, but now the survival after MI has improved substantially, with the consequence of increasing CHD prevalence, chronic disability and treatment costs.<sup>1–3</sup> Coronary heart disease is projected to remain a leading cause of death and disability not only in affluent countries but globally for many years to come.<sup>3</sup> Effective prevention strategies are needed if we are to limit the growing burden of CHD.

Coronary heart disease is nearly always caused by coronary atherosclerosis with or without luminal thrombosis and vasospasm.<sup>4,5</sup>

Atherosclerosis alone may cause stable angina but is rarely fatal. In contrast, thrombosis plays a major role in the pathogenesis of the life-threatening acute coronary syndromes (ACS), including ST-segment elevation myocardial infarction (STEMI), non-STEMI, and unstable angina—the latter, in particular, if acute chest pain occurs at rest.<sup>6,7</sup> Another common presentation of atherothrombosis is sudden coronary death.<sup>8,9</sup> Rare non-atherosclerotic causes of ACS include coronary arteritis, trauma, dissection, thromboembolism, congenital anomalies, cocaine abuse, and complications of cardiac catheterization.<sup>10</sup>

In this review, we will try to explain how a chronic disease that evolves silently over decades (atherosclerosis) suddenly and often unexpectedly puts a patient's health and life at risk due to coronary thrombosis.

\* Corresponding author. Tel: +1 301 208 3570, Fax: +1 301 208 3745, Email: [rvirmani@cvpath.org](mailto:rvirmani@cvpath.org)

Published on behalf of the European Society of Cardiology. All rights reserved. © The Author 2012. For permissions please email: [journals.permissions@oup.com](mailto:journals.permissions@oup.com)

Atherothrombosis

Atherosclerosis is a systemic, lipid-driven immune-inflammatory disease of medium-sized and large arteries leading to multifocal plaque development,<sup>11–14</sup> predominantly at predilection sites characterized by low and oscillatory endothelial shear stress.<sup>15,16</sup> The disease begins to develop early in life but the speed of progression varies greatly and is difficult to predict. However, it usually takes decades to develop the advanced lesions responsible for clinical disease, offering unique opportunities for timely detection and personalized prevention. While most plaques remain asymptomatic (subclinical disease), some become obstructive (stable angina), and a few become thrombosis-prone (vulnerable) and may lead to an ACS. Although causal risk factors for atherothrombosis and CHD are well-known and constitute important therapeutic targets, their predictive value on a per-patient basis is limited,<sup>17,18</sup> and it remains a challenge to identify the apparently healthy individuals who are at high risk for the development of ACS event and need intensified prevention.

Plaques underlying coronary thrombi

It is much easier to explain an accident after it has occurred than to predict it. The same is true for coronary thrombosis. Therefore, let

us first focus on the accident that did happen, the thrombosed coronary artery. Based on a review of the literature, including 22 autopsy studies in which 1847 coronary arteries were explored microscopically with the purpose of identifying the underlying cause of thrombosis, it can be concluded that the great majority of coronary thrombi (73%) developed on top of a ruptured atherosclerotic plaque (Table 1).<sup>19–41</sup>

Plaque rupture

Although pathologists appear to agree on what a ruptured plaque looks like in the microscope, the use of less well-defined terms such as disruption and fissuring have led to some confusion. While some investigators have used these terms synonymously,<sup>6,42</sup> others have not.<sup>43,44</sup> In a consensus statement, plaque rupture was defined as a structural defect—a gap—in the fibrous cap that separates the lipid-rich necrotic core of a plaque from the lumen of the artery (Figure 1).<sup>45</sup> Davies<sup>46</sup> used the terms fissure and rupture interchangeable and stressed that a variable mix of haemorrhage into the plaque and luminal thrombosis originating from the fissure/rupture site characterizes culprit lesions in ACS. In Virmani’s experience, ‘fissure’ is defined as a lateral tear in an eccentric plaque with underlying small necrotic core. The superficial tear lifts a layer of the intima from the underlying fibrous tissue and the haemorrhage extends into the necrotic core and this tract is usually lined by macrophages. The lumen usually has a small

Table 1 Plaque rupture underlying 1345 (73%) of 1847 fatal coronary thrombi worldwide

| Patients           | Age, <sup>a</sup> years | Cases, n | Rupture, %     | Study                                        |
|--------------------|-------------------------|----------|----------------|----------------------------------------------|
| Hospital, -        | —                       | 19       | 19/19 = 100    | Chapman <sup>19</sup>                        |
| Hospital, -        | —                       | 17       | 17/17 = 100    | Constantinides <sup>20</sup>                 |
| Hospital, AMI+SCD  | 58                      | 40       | 39/40 = 98     | Friedman and Van den Bovenkamp <sup>21</sup> |
| Hospital, AMI      | 62                      | 88       | 71/88 = 81     | Bouch and Montgomery <sup>22</sup>           |
| Hospital, AMI      | 66                      | 91       | 68/91 = 75     | Sinapius <sup>23</sup>                       |
| Coroner, SCD       | 53                      | 20       | 19/20 = 95     | Friedman et al. <sup>24</sup>                |
| Hospital, AMI      | 67                      | 76       | 69/76 = 91     | Horie et al. <sup>25</sup>                   |
| Hospital, AMI      | 67                      | 49       | 40/49 = 82     | Falk <sup>26</sup>                           |
| Coroner, SCD       | <65                     | 32       | 26/32 = 81     | Tracy et al. <sup>27</sup>                   |
| Med. Exam, SCD     | <70                     | 61       | 39/61 = 64     | El Fawal et al. <sup>28</sup>                |
| Hospital, AMI      | —                       | 83       | 52/83 = 63     | Yutani et al. <sup>29</sup>                  |
| Coroner, -         | —                       | 85       | 71/85 = 84     | Richardson et al. <sup>30</sup>              |
| Hospital, AMI      | 63                      | 20       | 12/20 = 60     | van der Wal et al. <sup>31</sup>             |
| Coroner, SCD       | —                       | 202      | 143/202 = 71   | Davies <sup>32</sup>                         |
| Hospital, AMI      | 69                      | 291      | 218/291 = 75   | Arbustini et al. <sup>33</sup>               |
| Hospital, AMI      | 61                      | 61       | 56/61 = 92     | Shi et al. <sup>34</sup>                     |
| Hospital, AMI      | 69                      | 100      | 81/100 = 81    | Kojima et al. <sup>35</sup>                  |
| Med. Exam, SCD     | 48                      | 360      | 212/360 = 59   | Virmani et al. <sup>36</sup>                 |
| Med. Exam, AMI+SCD | —                       | 31       | 26/31 = 84     | Murai et al. <sup>37</sup>                   |
| Hospital, SCD      | —                       | 58       | 34/58 = 59     | Giannoukas and co-workers <sup>38</sup>      |
| Hospital, AMI      | —                       | 14       | 10/14 = 71     | Sato et al. <sup>39</sup>                    |
| Coroner, SCD       | 54                      | 49       | 23/49 = 47     | Subirana et al. <sup>40</sup>                |
| AMI + SCD          | —                       | 1847     | 1345/1847 = 73 | Worldwide                                    |

Data from Virmani et al.<sup>36</sup> is updated by adding recent cases. Modified and reproduced with permission from Falk et al., *J Am Coll Cardiol*, 2006;47:C7–C12.  
—, not reported; AMI, acute myocardial infarction; SCD, sudden coronary death.  
<sup>a</sup>Mean.

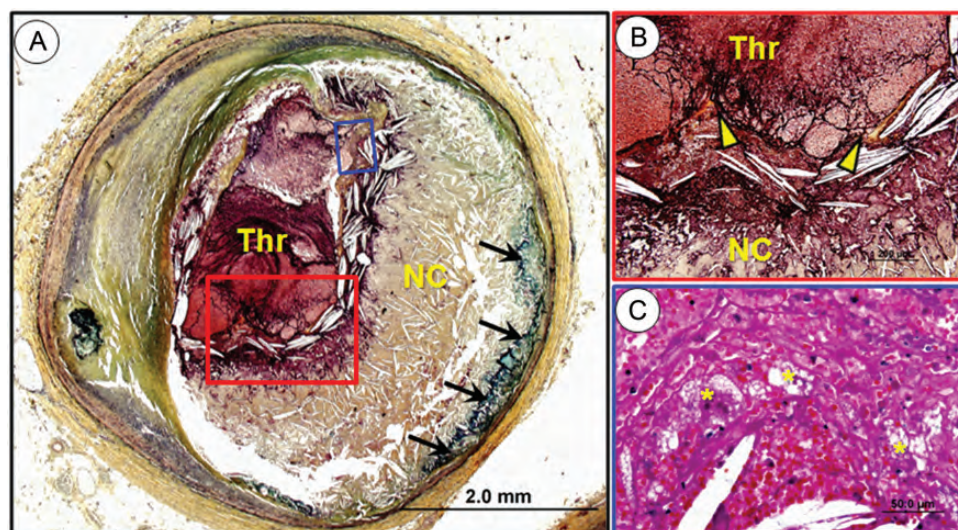

**Figure 1** Plaque rupture. Cross-sectional photomicrograph of a coronary artery showing plaque rupture. (A) Note the presence of an acute occlusive luminal thrombus with an underlying large necrotic core (NC) and almost total absence of a fibrous cap. The medial wall is destroyed and near the base of the NC note the presence of calcification (arrows). (B) Higher-magnification image of the rupture site (red box in A). Thin fibrous cap is disrupted (arrowheads). (C) Higher-magnification of thrombus with cholesterol clefts, (blue box in A), red cells, and foamy macrophages (asterisks).

difficult to appreciate thrombus. In our experience, this lesion is seen in 10–15% of sudden coronary death cases.

In our world-wide survey (Table 1), plaque rupture was the main cause of coronary thrombosis regardless of clinical presentation (MI: 79%; sudden coronary death: 65%), age (>60 years: 77%; <60 years: 64%; unknown: 73%), sex (men: 76%; women: 55%), and continent (Europe: 72%; USA: 68%; Asia 81%). The gender differences appears noteworthy. Recent clinical observations have confirmed that plaque rupture is the most common cause of coronary thrombosis not only in patients dying from the disease but also in those who survive.<sup>47</sup> Furthermore, clinically silent plaque rupture is not a rare phenomenon,<sup>48,49</sup> and plaque rupture with mural thrombosis appears to be a common cause of episodic but asymptomatic progression to severe stenosis.<sup>50,51</sup> These pathoanatomical findings explain classical clinical observations,<sup>52–55</sup> indicating that progression of atherosclerosis involves two distinct processes: a chronic one that leads to luminal narrowing slowly (atherosclerosis), and an acute one that causes rapid luminal obstruction (plaque haemorrhage and/or luminal thrombosis).

### Plaque erosion (thrombosis without plaque rupture or calcified nodule)

As Table 1 indicates, a ruptured plaque is not found beneath all coronary thrombi. However, it was not until the 1990's that the generic term 'plaque erosion' was introduced for thrombosis without plaque rupture.<sup>31,56</sup> Plaque erosion is 'identified' when serial sectioning of the thrombosed arterial segment fails to reveal plaque rupture (Figure 2).<sup>36</sup> Typically, the endothelium is missing at the erosion site, and the exposed intima consists

predominantly of vascular smooth muscle cells and proteoglycans. The underlying plaque morphology shows presence of pathological intimal thickening or a fibroatheroma with an intact media, whereas in ruptured plaques the media is often destroyed.

Observations by Virmani *et al.*<sup>36</sup> indicate that the eroded site is minimally inflamed, but not all agree on that.<sup>31,57</sup> While Farb *et al.*<sup>56</sup> reported that, on average, eroded plaques with thrombosis are less obstructive than ruptured plaques with thrombosis, Kojima *et al.*<sup>35</sup> found no association between the degree of stenosis and the type of thrombosis, and Davies<sup>4</sup> found an association opposite to that reported by Farb *et al.* Sato *et al.*<sup>39</sup> observed that asymptomatic coronary thrombi usually were small and related to non-obstructive plaques with erosion rather than thrombi derived from plaque rupture while in patients dying of AMI the degree of underlying luminal narrowing and the size of coronary thrombi are significantly larger but equivalent between erosion and rupture. However, we must look at population being studied. Kojima *et al.* studied only patients presenting with acute MI (AMI). Davies *et al.* also studied patients dying suddenly but may have had known coronary heart disease. Virmani *et al.* studied patients dying of sudden coronary death but never having had any previous known heart disease. Also, the age of the patient population is significantly different:  $49 \pm 10$  years by Virmani,  $69 \pm 10$  years by Kojima, and those from Davies studies varied from 37 to 69 years but no mean age is available. Clinical studies of optical coherence tomography (OCT) performed in patients presenting with AMI showed that the incidence of fibrous cap disruption was 73%, whereas plaque erosion was 23% and patients with plaque rupture had a higher incidence of thin cap fibroatheroma 83%;<sup>47</sup> results were very similar to autopsy study published by Arbustini *et al.* in hospital patients dying with STEMI.<sup>33</sup> Recent data



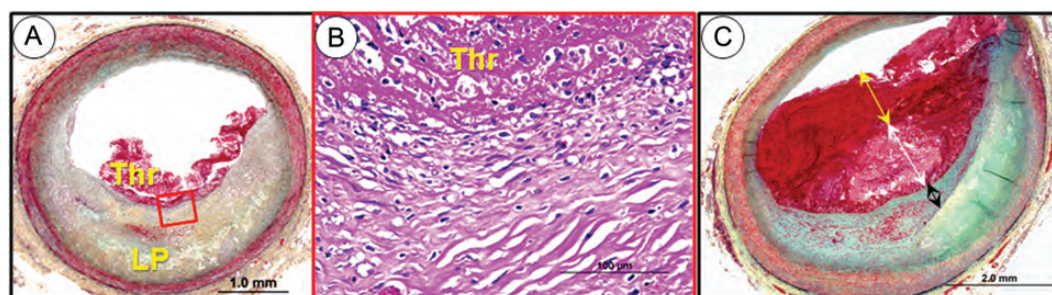

**Figure 2** Plaque erosion. Cross-section of a coronary artery showing plaque erosion. (A) A non-occlusive thrombus (Thr) is present on the surface of a plaque which consists of pathological intimal thickening, note the artery is insignificantly narrowed. There is no connection between thrombus and the lipid pool (LP) and the media is intact. (B) Higher-magnification image of the red box in (A). Note the presence of thrombus and the underlying plaque which consists of smooth muscle cells in a proteoglycan–collagen rich matrix and there is absence of inflammation. (C) Shows another case of plaque erosion. The oldest layer of the plaque (black double arrow) is an organizing thrombus and is being replaced by smooth muscle cells in a proteoglycan-rich matrix and there is an overlying acute thrombus present in the lumen of varying ages (white and yellow double arrows).

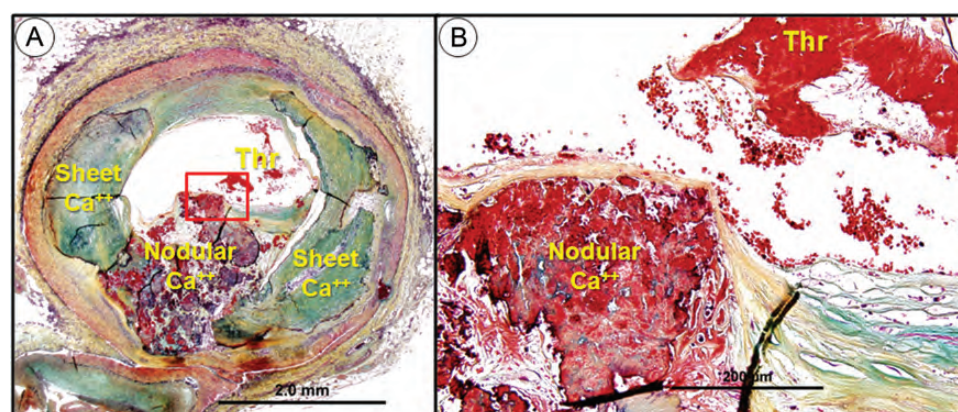

**Figure 3** Calcified nodule. Cross-section of the coronary artery showing the presence of calcified nodule. Nodular calcifications ( $\text{Ca}^{++}$ ) are identified between sheets of calcification. (B) Higher-magnification image of the red box in (A). The nodular calcification is protruding into the lumen area with an overlying non-occlusive thrombus.

(A.V. Finn et al., in preparation) also suggest that the distinction between thrombosis caused by eroded vs. ruptured plaques may have therapeutic implications.

The authors of this review agree on the frequency of plaque rupture beneath coronary thrombi and consequently also on the complementary frequency of thrombi not caused by plaque rupture. However, a key question is whether the latter is a homogenous group that deserves the specific name ‘erosion,’ meaning that the endothelium is missing and implying that the missing endothelium plays a critical role in the development of coronary thrombosis on non-ruptured plaques. Falk and coworkers find it counterproductive to use a plaque-specific term for acute atherothrombotic events that may be precipitated by a systemic prothrombotic state and/or local flow disturbances rather than by

missing endothelium. On the other hand, the missing endothelium may be the result of vasospasm a condition that cannot be diagnosed at autopsy, and the vessels show negative remodelling.

### Calcified nodule

In 2000, the term ‘calcified nodule’ was introduced by Virmani et al. for a rare type of coronary thrombosis not caused by plaque rupture but related to disruptive nodular calcifications protruding into the lumen (Figure 3).<sup>36</sup> These occur usually in older individuals and in tortuous heavily calcified arteries. Calcified nodules have distinct features identifiable by intravascular ultrasound (irregular and convex luminal surface) permitting their identification *in vivo*.<sup>58</sup> Surprisingly, calcified nodules identified by intravascular ultrasound in PROSPECT (Providing Regional Observations to

Study Predictors of Events in the Coronary Tree) were unlikely to cause coronary events during 3-year follow-up.<sup>59</sup>

## Risk factors and type of thrombosis

Does any relationship exist between the traditional risk factors and the mechanism behind the final thrombotic occlusion of a coronary artery? Except for sex and menopause, the short answer is no, not consistently. Here follows a summary of a more detailed review.<sup>60</sup>

Plaque rupture is a more common cause of coronary thrombosis in men (~80%) than in women (~60%),<sup>26,33</sup> and plaque rupture is especially rare in pre-menopausal women.<sup>61</sup> Regarding lipids, Burke *et al.* found a statistically significant association between thrombosis caused by plaque rupture (vs. erosion) and high total cholesterol (TC), low high-density lipoprotein cholesterol (HDL-C), and high TC/HDL-C ratio in men.<sup>9</sup> In women, only TC correlated with plaque rupture.<sup>61</sup> However, Kojima *et al.* found no relationship between TC and plaque rupture,<sup>35</sup> and rupture of a lipid-rich plaque is in fact the standard cause of coronary thrombosis in China (>90% of all cases), a population with a low average TC level.<sup>34</sup> Smoking seems to promote thrombosis rather than atherosclerosis,<sup>9,62</sup> and only few and inconsistent data exist on a possible relationship between smoking and type of thrombosis. Burke *et al.* found a relatively high frequency of smokers in pre-menopausal females with plaque erosion,<sup>61</sup> but no association in men,<sup>9</sup> and Kojima *et al.* reported that smoking was associated with plaque rupture.<sup>35</sup> For diabetes and/or glycosylated haemoglobin, contrasting results have been reported. Burke and Kojima found no association to the type of thrombosis,<sup>9,35</sup> but Davies observed that diabetes was associated with plaque erosion.<sup>4,32</sup> Hypertension does not appear to favour any particular type of thrombosis.<sup>9,26,35,61</sup> Regarding circulating biomarkers of inflammation, Burke *et al.* found no relationship between C-reactive protein measured post-mortem and the type of thrombosis,<sup>62</sup> confirmed recently *in vivo* by OCT in patients with ACS.<sup>63</sup> On the other hand, another circulating inflammatory biomarker, myeloperoxidase (MPO) was higher in patients with OCT-defined plaque erosion than rupture, and the density of MPO-positive cells was higher within thrombi overlying eroded (vs. ruptured) plaques in fatal coronary thrombosis.<sup>63</sup> Other biomarker that has recently been also implicated and are associated with the presence of multiple complex lesion morphology include neopterin, a pteridine derivative that is secreted by macrophages after stimulation by interferon  $\gamma$ .<sup>64</sup> Similarly, pregnancy-associated plasma protein-A (PAPP-A), a zinc-binding metalloproteinase, which has been reported to be abundantly expressed in ruptured unstable plaques and also in angiographic complex plaques.<sup>65</sup>

## Plaques leading to coronary thrombosis: vulnerable plaques

Knowing how a thrombosed coronary artery looks in the microscope, it is possible to infer what the underlying plaque looked like just before the thrombus evolved. The term vulnerable plaque has been used for such plaques assumed to be at high risk of thrombosis.<sup>45</sup> As mentioned earlier, calcified nodules do

not seem to be high-risk lesions,<sup>59</sup> leaving two major types of vulnerable plaques, the rupture-prone and the erosion-prone. They are presumed to look like the corresponding thrombosed plaques, just with preserved surface without thrombosis.

## Rupture-prone plaques

The prototype of a presumed rupture-prone plaque contains a large and soft lipid-rich necrotic core covered by a thin and inflamed fibrous cap.<sup>42,66</sup> Associated features include big plaque size, expansive remodelling mitigating luminal obstruction (mild stenosis by angiography), neovascularization (angiogenesis), plaque haemorrhage, adventitial inflammation, and a 'spotty' pattern of calcifications (Table 2). Although the macrophage density in ruptured fibrous caps is high,<sup>41,66</sup> whole-plaque macrophage density rarely exceeds a few percent because ruptured caps are tiny.<sup>67,68</sup>

## Erosion-prone plaques

Vulnerable plaques of the erosion-prone type are heterogeneous and defined only by their fate (thrombosis, mostly mural).<sup>36</sup> The surface endothelium is missing, but whether it vanished before or after thrombosis remains unknown. No single morphological features have been identified but, in general, eroded plaques with thrombosis are scarcely calcified, rarely associated with expansive remodelling, and only sparsely inflamed.<sup>36</sup> Thus, it remains a challenge to distinguish erosion-prone plaques from stable plaques by imaging.<sup>69</sup> However, recent clinical imaging studies by OCT have confirmed the presence of plaque erosion based on patients with aspiration of thrombi with absence of discontinuation of fibrous cap.<sup>70,71</sup> We still do not really understand the specific plaque features which specifically distinguish plaques prone to erosion from more stable plaque types.

## Location and natural history

Vulnerable plaques, plaque rupture, and thrombosed plaques tend to cluster in 'hot spots' within the proximal segments of the major

**Table 2** Features of ruptured plaques<sup>a</sup>

|                                            |
|--------------------------------------------|
| Thrombus                                   |
| Large necrotic core (>30% of plaque)       |
| Fibrous cap covering the necrotic core     |
| Thin (thickness usually <65 $\mu$ m)       |
| Many macrophages (inflammation)            |
| Few smooth muscle cells (apoptosis)        |
| Expansive remodelling preserving the lumen |
| Neovascularization from vasa vasorum       |
| Plaque haemorrhage                         |
| Adventitial/perivascular inflammation      |
| 'Spotty' calcification                     |

<sup>a</sup>The same features, except rupture of the cap and luminal thrombus, characterize vulnerable plaques of the rupture-prone type.

coronary arteries,<sup>72–74</sup> and rarely more than one or a few such lesions exist simultaneously.<sup>26,75</sup> The natural history of vulnerable plaques such as the speed of development, lifetime (persistence) and fate, is, however, unknown.

## Structural determinants of plaque rupture

Plaque rupture, the most common cause of coronary thrombosis, requires the presence of a lipid-rich necrotic core covered by a thin fibrous cap. The size of the necrotic core and the thickness of the fibrous cap appear to be the two major structural determinants of vulnerability, along with macrophage infiltration of the fibrous cap.

## Necrotic core

During atherogenesis, the atherogenic lipoproteins are retained within the intima, modified and accumulate predominantly deeply in the abluminal part of the intima.<sup>13,76,77</sup> Some of these ‘pools’ of lipids seem to attract macrophages that secrete proteolytic enzymes and engulf lipid until they die, leaving behind a soft and destabilizing lipid-rich cavity containing cholesterol crystals and devoid of supporting collagen and cells, the ‘necrotic core.’<sup>36,42,78</sup> Such a plaque is called an ‘atheroma’ or ‘fibroatheroma.’<sup>36,43</sup> Recent evidence suggests that macrophage apoptosis coupled with defective phagocytic clearance of the apoptotic cells (efferocytosis) promotes plaque necrosis,<sup>12</sup> and extravasation of erythrocytes into the necrotic core may expand it (see ‘Intraplaque haemorrhage’ section subsequently).

## Fibrous cap

The fibrocellular part of the plaque located between the necrotic core and the lumen is called the ‘fibrous cap.’ It is extremely thin in coronary plaque rupture.<sup>42,66</sup> Assessed by microscopic examination post-mortem, ruptured caps were usually <65 µm thick.<sup>36</sup> Assessed by OCT *in vivo*, the mean thickness was only 49 µm.<sup>47</sup> If the fibrous cap is thin, the plaque is called a ‘thin-cap fibroatheroma’ (TCFA).<sup>36</sup> In TCFA, the necrotic core occupies ~23% of plaque area.<sup>66</sup> The amount of inflammation varies, but culprit lesions in ACS are usually more inflamed than those in stable angina,<sup>79,80</sup> and the thin and disrupted fibrous caps are usually heavily inflamed (macrophage density ~26%).<sup>66</sup> Although the ability of a thin fibrous cap to accommodate macrophages is limited,<sup>68</sup> pro-inflammatory macrophages within the cap could play a key role in its degradation and ultimate rupture by secreting proteolytic enzymes such as matrix metalloproteinases.<sup>5,81</sup> Mast cells also have the potential to promote degradation of the fibrous cap.<sup>82</sup> Apoptosis is common at the site of fibrous cap rupture, usually confined to macrophages because the vascular smooth muscle cells (SMCs) already have vanished when rupture occurs.<sup>83,84</sup> With their ability to synthesize extracellular matrix, including collagen, loss of SMC is associated with impaired healing and repair, increasing the risk of plaque rupture.<sup>85</sup>

Atherosclerosis is an innate inflammatory disease in which smoldering inflammatory activity is not confined to just a few atherosclerotic lesions but is present, more or less, in all such lesions throughout the body.<sup>86,87</sup> In contrast, vulnerable plaques are relatively rare,<sup>76</sup> and inflammation may play a causal role in plaque rupture only if located within a thin fibrous cap, i.e. the microstructure of the plaque needs to be permissive for rupture. Thus, although plaque inflammation may be useful as a marker of disease activity, it is probably not useful as a stand-alone marker for plaque vulnerability.<sup>88</sup>

It has been reported that the two major determinants of plaque vulnerability, core size and cap thickness, are unrelated statistically.<sup>89</sup> Furthermore, neither of these two factors alone confers vulnerability and are not related to absolute plaque size or to the degree of stenosis.

## Intraplaque haemorrhage

Plaque haemorrhage has for decades been recognized as an important cause of rapid plaque progression,<sup>26</sup> but not until recently was the focus shifted to plaque neovascularization (angiogenesis) and its role in intraplaque haemorrhage and the development of a vulnerable (rupture-prone) plaque.<sup>90</sup> To understand the background for the current way of thinking, it is appropriate to recapitulate Michael Davies’ view on the role of plaque haemorrhage in the pathogenesis of sudden coronary death.<sup>8</sup> He concluded that ‘we have avoided the term “plaque hemorrhage,” since it is a source of confusion. “Plaque fissuring” is the term applied to the formation of an opening from the lumen into the intima; it leads to what was known originally as “dissecting hemorrhage” but is actually an intraintimal thrombus containing not just red cells but mainly fibrin and platelets. Pure plaque haemorrhage is defined as the presence of red cells within a plaque and is derived from small capillaries crossing into the intima from the media. Plaque fissuring is an important process; pure plaque haemorrhage was so universal in both test and control hearts that we have ignored it.’<sup>8</sup>

The question is whether we should ignore angiogenesis-derived plaque haemorrhage because it is universal or, for the same reason, explore it. We favour the latter. Recent evidence indicates that plaque haemorrhage may play an important role in rapid progression of atherosclerosis and, in particular, may contribute to necrotic core expansion and plaque vulnerability.<sup>90</sup> However, as stressed by Davies and others,<sup>26</sup> plaque haemorrhages do not always originate from plaque neovascularization (angiogenesis), some of the largest originate in fact from the lumen (plaque rupture), and this distinction is not just academic but may have important prognostic and therapeutic implications. As illustrated in Figure 4, it is not always easy to identify the origin of a plaque haemorrhage. We as authors of this joint manuscript do not always have similar opinions as in the case of plaque haemorrhage—vasa vasorum playing an important role is the dominant view in the literatures and by Virmani et al.; however, Falk et al., similar to Davies, believes plaque rupture/fissure may be more important. Regardless of the origin of the haemorrhage, we can all agree that the occurrence of substantial plaque haemorrhage is an important event in the life of a plaque. It results in sudden enlargement of the plaque size resulting in luminal narrowing and is a



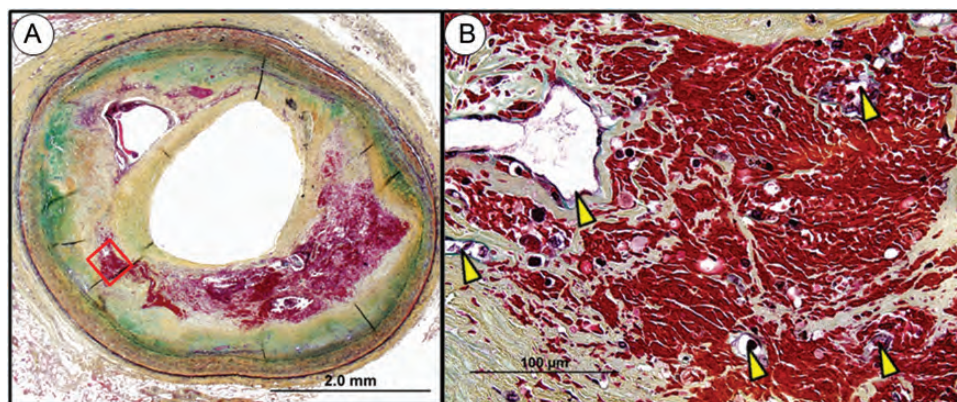

**Figure 4** Intraplaque haemorrhage. Cross-section of a coronary artery showing haemorrhage into a plaque (necrotic cores) with severe narrowing of the lumen. (B) Higher-magnification of the red box area in (A). Note the presence of a number of small capillaries of varying sizes (arrowheads) in the area of haemorrhage. However, the mere presence of neovascularization does not prove that these haemorrhages originate from these fragile low-pressure microvessels within the plaque. Another possibility is a high-pressure haemorrhage from the lumen of the artery into the plaque via a ruptured fibrous cap not revealed in this particular cross-section of the lesion.

very important source of free cholesterol from the red cell membranes, which are rich in free cholesterol and cholesterol esters.<sup>90,91</sup>

Angiogenesis and inflammation often coexist at the base of advanced plaques.<sup>92</sup> The new microvessels rarely originate from the lumen but usually from vasa vasorum in adventitia.<sup>93,94</sup> They lack supporting cells and are fragile and leaky, giving rise to local extravasation of plasma proteins and erythrocytes.<sup>95–97</sup> Such intraplaque bleedings are common<sup>8</sup> and may expand the necrotic core, causing rapid progression of the lesion.<sup>90</sup> Another common source of plaque haemorrhage is extravasation of blood through a ruptured fibrous cap,<sup>26</sup> called an inraintimal thrombus by Davies.<sup>8</sup> An unresolved and interesting question involves whether haemorrhage itself either helps to resolve neovascularization or simply promotes it further.

## Macrophage polarization

Macrophages play a very important role in the progression of atherosclerosis along with other cells like the T-cells and smooth muscle cells.<sup>98</sup> It is now well recognized that at least two if not three types of macrophage subtypes can be observed in atherosclerotic plaques. The most common macrophages in the atherosclerotic plaques are the classically activated macrophages M1, which are induced by INF- $\gamma$  or other T helper 1 (Th1) cytokines, and trigger a pro-inflammatory response. Within the atherosclerotic plaque, these M1 cells show MHC class II expression and are foamy in nature, i.e. have a high lipid intake. The alternative M2 macrophages are activated by a different pathway through T helper 2 (Th2) cytokines, i.e. interleukin-4 (IL-4) and IL-13. Bouhrel et al.<sup>99</sup> described the presence of this type of macrophages (M2) in atherosclerotic plaques and reported that PPAR $\gamma$  controlled the M2 differentiation, which results in anti-inflammatory activity within the plaque. Boyle et al.<sup>100</sup> and our own group demonstrated that another type of macrophages

exists in the plaque and occurs at the sites of haemorrhage or angiogenesis (Figure 5). We have shown that these haemoglobin-stimulated macrophages (M(Hb)) express both CD163 and mannose receptors and are devoid of neutral fats, which is typical of the foamy macrophages. The Hb macrophages in the plaque show the absence of CD36 expression (i.e. scavenger receptors) and instead have a high expression of ATP-binding cassette transporters.<sup>98,100</sup> They do not demonstrate the presence of pro-inflammatory cytokines such as TNF- $\alpha$  and have reduced the production of inducible nitric oxide synthase (iNOS). A decrease in intracellular iron likely plays a pivotal role in driving the transcription of genes which protect these cells from lipid accumulation in part by reducing intracellular iron-driven production of reactive oxygen species such as hydroxyl radical (OH $^\bullet$ ) through the up-regulation of ferroportin.

## Plaque size, luminal obstruction, and remodelling

During atherogenesis, the artery tends to remodel in such a way that the luminal obstruction caused by some plaques is attenuated (expansive remodelling) and by others accentuated (constrictive remodelling). Although vulnerable plaques of the rupture-prone type (TCFA) are usually big,<sup>101</sup> they often are invisible or appear non-obstructive by angiography because of compensatory expansive remodelling and/or extension of the plaque to the adjacent reference segments judged to be normal by angiography.<sup>102,103</sup> In contrast, plaques responsible for stable angina usually are smaller but, nevertheless, often associated with more severe luminal narrowing by angiography because of concomitant constrictive remodelling.<sup>103</sup> The reasons for the different modes of remodelling remain to be defined, but recent clinical observations indicate that diabetes is accompanied by inadequate compensatory remodelling.<sup>104</sup>

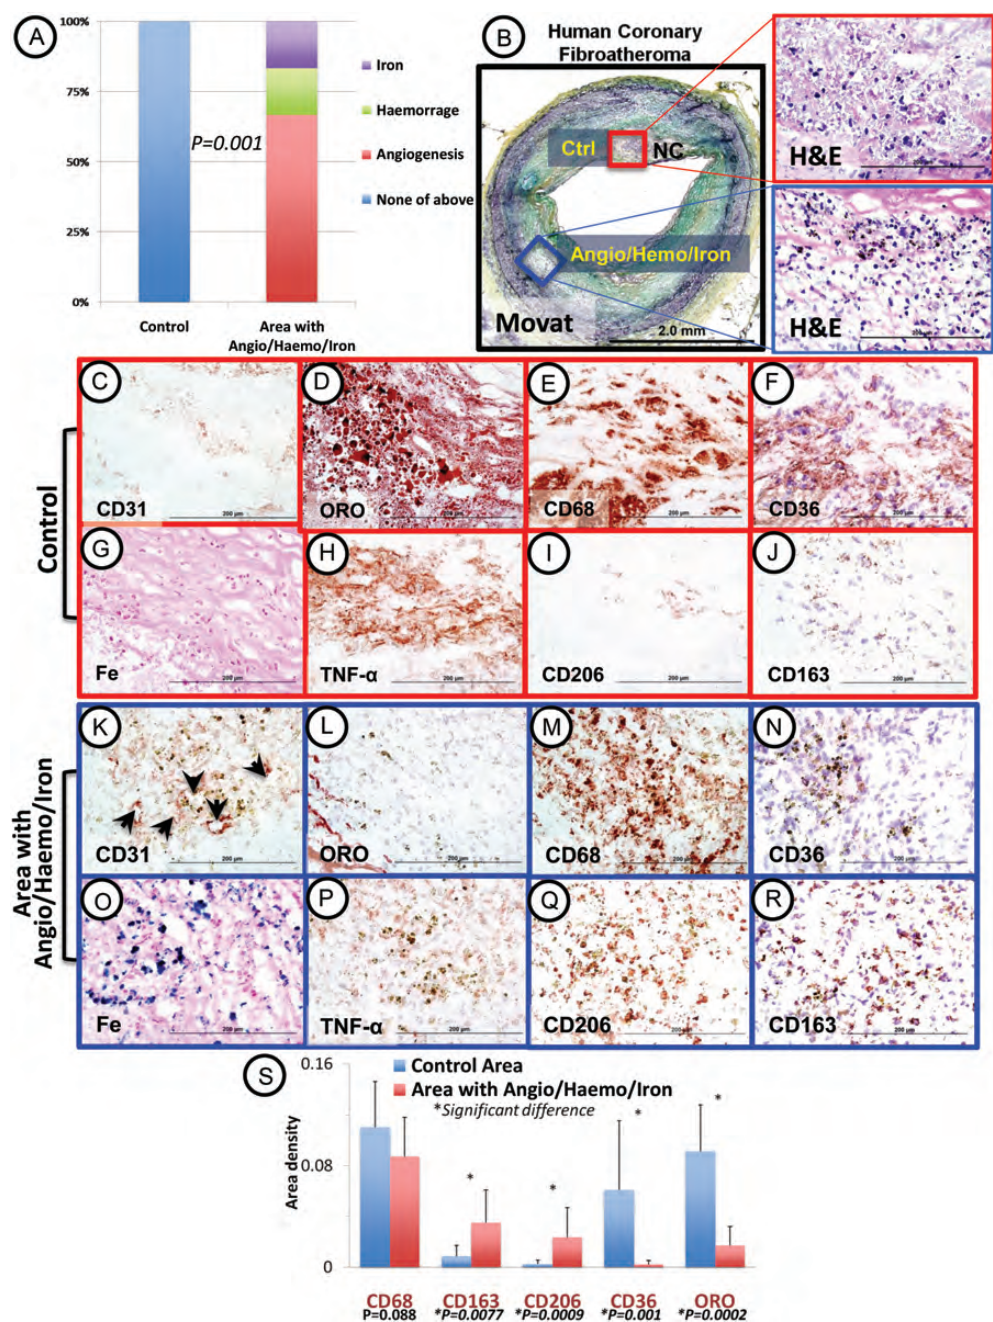

**Figure 5** M2 markers CD206/CD163 are preset in human atherosclerotic lesions at the site of prior haemorrhage and are distinct from foam cells. (A) Plaque regions were identified by the presence of angiogenesis/haemorrhage/iron (Angio/Haemo/Iron) and compared with control (Ctrl) pericore regions of macrophages devoid of Angio/Haemo/Iron. (B) Representative frozen section of human coronary fibroatheroma from a 48-year-old man who died suddenly. High-power image from Ctrl (red box) shows foamy macrophages in the perinecrotic core (NC) region. The blue box shows an area rich in angiogenesis and iron. Low-power image, Movat stain; high-power images, haematoxylin and eosin (H&E) stain. Photomicrographs of the boxed areas from Ctrl (red boxes) (C–J) and area of Angio/Haemo/Iron (blue boxes) (K–R). Note that the Ctrl area shows a lack of CD31 staining (brown) (C), abundant oil red O (ORO) positivity (red) (D), macrophage infiltration (CD68, brown) (E), CD36 staining (brown) (F), and no iron staining (blue, Perl Prussian blue) (G). It also demonstrates abundant tumour necrosis factor  $\alpha$  (TNF- $\alpha$ ) positivity (brown) (H), but there is minimal MR (CD206, brown) (I) and CD163 (brown) (J) immunostaining. (K–R) are from an area of Angio/Haemo/Iron showing abundant CD31 staining (K, black arrows point to angiogenesis), rare positive cells for oil red O (L), but abundant C68 staining (M). This area also demonstrates minimal CD36 staining (N), but abundance of iron (O), minimal TNF- $\alpha$  staining (P), but positive staining for CD206 and CD163 (Q and R). Quantitative analysis (S) from Ctrl and Angio/Haemo/Iron areas from 14 plaques demonstrated equivalent macrophage area density (CD68) but higher expression of CD163 and CD206 in regions of Angio/Haemo/Iron than in Ctrl regions. Scale bars: low-power, 2 mm; high-power: 200  $\mu$ m (non-normal distribution CD68 and CD163). Fe = iron. (Reproduced with permission from Finn et al.<sup>98</sup>)



## Calcification

Focal calcifications in atherosclerotic plaques are very common and increase with age.<sup>105</sup> At autopsy, the amount of coronary artery calcium (CAC) correlates only modestly with luminal narrowing but more strongly with plaque burden.<sup>106</sup> Apoptotic cells, extracellular matrix, and necrotic cores may calcify, healed ruptured plaques are often heavily calcified, and microcalcifications have been described in the fibrous cap.<sup>107,108</sup> The pathogenesis and clinical significance of these different forms of calcifications are, however, poorly understood. Non-atherosclerotic calcifications of coronary arteries are exceedingly rare except in chronic renal failure where Mönckeberg medial calcific sclerosis may be seen.<sup>109</sup>

Clinical observations suggest that culprit lesions responsible for ACSs generally are less calcified than plaques responsible for stable angina, indicating that calcium confers stability to plaques rather than the opposite.<sup>110</sup> However, the pattern of plaque calcification may also matter; a 'spotty' (vs. dense) pattern is more common in high-risk vs. lower-risk plaques.<sup>111–113</sup> The total amount of calcification—the CAC score—is a marker of plaque burden (and thus a marker of cardiovascular risk) rather than a marker of risk conferred by the individual plaque.<sup>114</sup> The questionable predictive value of calcified nodules has already been discussed, and the clinical usefulness of the CAC score in risk stratification will be discussed at the end of this review.

## Prospective detection of vulnerable plaques

PROSPECT (Providing Regional Observations to Study Predictors of Events in the Coronary Tree) was the first and is the largest natural-history study of coronary atherosclerosis using multimodality intracoronary imaging to identify vulnerable plaques to date.<sup>115</sup> Assessed by angiography, most new coronary events originated from non-obstructive lesions. By intravascular ultrasound, larger plaque burden (>70% cross-sectional area narrowing) and smaller minimal luminal area (<4.0 mm<sup>2</sup>) and the presence of a virtual histology (VH)-defined TCFA were independently associated with an increased risk for subsequent events. Those few lesions that possessed all three characteristics had an 18.2% rate of major coronary events during the 3.4-year follow-up period. However, the predictive power of VH-defined TCFA alone was low, mainly because of poor specificity. Of 595 TCFA identified by VH, only 26 led to coronary events during follow-up. This disappointing result may not necessarily mean that the vulnerable plaque concept is flawed, it may rather indicate that the tools used to prove the concept are inadequate to correctively identify high-risk plaques.<sup>116–118</sup> Further prospective study of this issue is warranted as newer more sensitive imaging technologies become available.

## Onset of ACS: vulnerability vs. triggers

Sudden rupture of a thin and inflamed fibrous cap may occur spontaneously but triggering could also play a role and thus help

explaining the non-random onset of ACS. As reviewed recently, many studies have identified a transiently increased risk of ACS during or immediately after short-term exposure to 'acute risk factors' such as physical and sexual activity, anger, anxiety, work stress, earthquakes, war and terror attacks, temperature changes, infections, and cocaine use.<sup>119</sup> The triggering pathways may include activation of the sympathetic nervous system with transient increases in blood pressure, heart rate, platelet activity, and arrhythmias, leading to plaque rupture, thrombosis, and/or sudden death in susceptible individuals. The absolute risk of an acute cardiovascular event depends on the baseline risk that increases with the number of risk factors and evidence of pre-existing cardiovascular disease. In this context, it is important to stress that regular physical activity (fitness) is associated with a lower baseline risk.

Although the relative risk of ACS during or immediately after a triggering activity may seem substantial, the absolute risk is usually small in individuals without known cardiovascular disease.<sup>119</sup> For instance, in a population-based study in which vigorous physical exertion was associated with a six-fold increased risk of MI, this led to an average of only 1.5 excess events per million hours of physical activity.<sup>120</sup> We have previously provided autopsy evidence for a link between vulnerable plaques in the coronary arteries and exertion-induced plaque rupture in sudden coronary death.<sup>121</sup> However, exercise stress testing in patients with advanced coronary atherosclerosis rarely triggers an ACS, suggesting that potential stressors may trigger events only among the relatively few susceptible individuals.

## Clinical presentation: dynamic thrombosis and collaterals

The culprit lesion in ACS is frequently 'dynamic,' causing intermittent flow obstruction,<sup>122–126</sup> and the clinical presentation and the outcome depend on the location of the obstruction and the severity and duration of myocardial ischaemia.

A non-occlusive or transiently occlusive thrombus most frequently underlies ACS without ST-segment elevation, whereas a more stable and occlusive thrombus prevails in STEMI—overall modified by vascular tone and collateral flow.<sup>127,128</sup> A critical thrombotic component is also frequent in culprit lesions responsible for out-of-hospital cardiac arrest and sudden coronary death.<sup>8,9</sup> There are three major determinants of the thrombotic response to plaque rupture: the local thrombogenic substrate, local flow disturbances, and the systemic thrombotic propensity—also called 'Virchow's triad'.<sup>129</sup>

In plaque rupture, the exposed necrotic core appears to be very thrombogenic,<sup>130</sup> most likely due to tissue factor and prothrombotic microparticles left behind after apoptotic cell death.<sup>131,132</sup> In contrast to venous thrombosis, rapid flow and high shear forces are more important and promote thrombosis via shear-induced platelet activation.<sup>133</sup> A platelet-rich thrombus may indeed form and grow within a severe stenosis, where the blood velocity and shear forces are highest.<sup>123</sup> Finally, the state (activation) of platelets, coagulation, and fibrinolysis is critical for the outcome of plaque disruption, documented by the protective effect of

antiplatelet agents and anticoagulants in patients at risk of coronary thrombosis. In ACS, circulating tissue factor and prothrombotic microparticles could be critical for the thrombotic response to plaque disruption.<sup>132</sup>

## Platelets, fibrin, and thrombotic burden

In coronary thrombosis, the initial flow obstruction is usually caused by platelet aggregation, but fibrin is important for the subsequent stabilization of the early and fragile platelet thrombus. Thus, both platelets and fibrin are involved in the evolution of a stable and persisting coronary thrombus.<sup>123</sup> If the platelet-rich thrombus (white macroscopically) at the site of plaque disruption occludes the lumen totally, the blood proximal and distal to the occlusion will stagnate and may coagulate, giving rise to a secondarily formed venous-type stagnation thrombosis (red macroscopically).<sup>129</sup> Stagnation thrombosis may contribute significantly to the overall thrombotic burden, particularly in occluded vein grafts (no side branches), and thus hamper recanalization.<sup>134</sup> Clinical experiences indicate that it is indeed very difficult to recanalize an occluded vein graft rapidly by intravenous thrombolytic therapy alone.

## Dynamic thrombosis and microembolization

The thrombotic response to plaque rupture is dynamic: promoting a dynamic interplay between prothrombotic and prothrombolytic processes, and often associated with vasospasm.<sup>135</sup> Both occur simultaneously, causing intermittent flow obstruction, with partial thrombus dissolution and distal embolization.<sup>122,136</sup> The latter leads to microvascular obstruction, which may prevent myocardial reperfusion despite a 'successfully' recanalized infarct-related artery. Microvascular obstruction has been reported to be more frequent in erosion than in rupture in individuals presenting with sudden coronary death who have never been instrumented.<sup>137</sup>

## Primary prevention

Causal risk factors for CHD constitute important therapeutic targets, but their usefulness as predictors with any specificity for disease-related events is quite limited.<sup>17,18</sup> Most ACS occurs in people at average risk-factor level who are misclassified by traditional risk factor scoring, as low or intermediate risk.<sup>138,139</sup> Conversely, others are misclassified as high risk and advised to take drugs to reduce their risk factor(s). These facts of daily clinical practice remind us that, although exposure to causal factors is important, susceptibility to these factors and the disease in question might be even more important and complex. Despite great promise, genetic testing for susceptibility has not proven useful for risk stratification.<sup>140,141</sup>

Atherosclerosis develops silently over decades before symptoms eventually occur, offering unique opportunities for timely detection and personalized prevention. Subclinical atherosclerosis can be detected and quantified non-invasively, to show the

cumulative effect of all risk and susceptibility factors combined—known and unknown.<sup>142</sup> Three measures of disease burden have proven useful for risk assessment in clinical practice: coronary artery calcium by computed tomography, intima-media thickness and plaque area on carotid ultrasound, and ankle-brachial index. The 2010 American College of Cardiology Foundation and American Heart Association's guidelines for cardiovascular risk assessment recommend (class IIa) the use of these non-invasive tests for subclinical atherosclerosis in asymptomatic adults at intermediate risk according to traditional risk-factor scoring.<sup>143</sup> Similarly, class IIa recommendations were included in the European Guidelines on cardiovascular disease prevention, version 2012.<sup>144</sup> These tests for subclinical (asymptomatic) atherosclerosis can correctly reclassify a substantial number of people in the therapeutic grey area called 'intermediate risk' to lower or higher risk categories, for which treatments are better defined.<sup>145–148</sup> In the near future, not only plaque burden but also disease activity and plaque vulnerability may be assessed by imaging,<sup>88,112,149–152</sup> with the potential to improve risk assessment further and thus limiting both undertreatment and overtreatment.

## Conclusions

We have systematically discussed plaque morphology associated with ACS and have also discussed very briefly macrophage subtypes that are present in human atherosclerotic plaques. What is clear overall is that the main cause of coronary thrombosis is plaque rupture and that risk factors are not always predictive of the extent of atherosclerosis in an individual patient but are predictive in large population studies. There is no controversy about the frequency of thrombosis not caused by plaque rupture, so called plaque erosion, but disagreement exists on the role of missing endothelium in the pathogenesis of coronary thrombosis. What can be agreed upon is that thrombosis-prone (vulnerable) plaques are worth identifying in order to treat such lesions aggressively but not necessarily invasively. However, this is a very complicated area of research fraught with problems but may be greatly helped by the development of newer imaging modalities in the future.

## Funding

The production of this manuscript is sponsored by Aarhus University Hospital Skejby, CVPPath Institute Inc., and Emory University Hospital and is independent of commercial funding.

**Conflict of interest:** none declared.

## References

1. Nabel EG, Braunwald E. A tale of coronary artery disease and myocardial infarction. *N Engl J Med* 2012;**366**:54–63.
2. Fuster V, Mearns BM. The CVD paradox: mortality vs prevalence. *Nat Rev Cardiol* 2009;**6**:669.
3. Heidenreich PA, Trogdon JG, Khavjou OA, Butler J, Dracup K, Ezekowitz MD, Finkelstein EA, Hong Y, Johnston SC, Khera A, Lloyd-Jones DM, Nelson SA, Nichol G, Orenstein D, Wilson PW, Woo YJ. Forecasting the future of cardiovascular disease in the United States: a policy statement from the American Heart Association. *Circulation* 2011;**123**:933–944.
4. Davies MJ. Stability and instability: two faces of coronary atherosclerosis. The Paul Dudley White Lecture 1995. *Circulation* 1996;**94**:2013–2020.
5. Libby P, Theroux P. Pathophysiology of coronary artery disease. *Circulation* 2005; **111**:3481–3488.

6. Davies MJ. The pathophysiology of acute coronary syndromes. *Heart* 2000;**83**: 361–366.
7. Arbab-Zadeh A, Nakano M, Virmani R, Fuster V. Acute coronary events. *Circulation* 2012;**125**:1147–1156.
8. Davies MJ, Thomas A. Thrombosis and acute coronary-artery lesions in sudden cardiac ischemic death. *N Engl J Med* 1984;**310**:1137–1140.
9. Burke AP, Farb A, Malcom GT, Liang YH, Smialek J, Virmani R. Coronary risk factors and plaque morphology in men with coronary disease who died suddenly. *N Engl J Med* 1997;**336**:1276–1282.
10. Hamm CW, Bassand JP, Agewall S, Bax J, Boersma E, Bueno H, Caso P, Dudek D, Gielen S, Huber K, Ohman M, Petrie MC, Sonntag F, Uva MS, Storey RF, Wijns W, Zahger D, Bax JJ, Auricchio A, Baumgartner H, Ceconi C, Dean V, Deaton C, Fagard R, Funck-Brentano C, Hasdai D, Hoes A, Knuuti J, Kolh P, McDonagh T, Moulin C, Poldermans D, Popescu BA, Reiner Z, Sechtem U, Sirnes PA, Torbicki A, Vahanian A, Windecker S, Achenbach S, Badimon L, Bertrand M, Botker HE, Collet JP, Crea F, Danchin N, Falk E, Goudevos J, Gulba D, Hambrecht R, Herrmann J, Kastrati A, Kjeldsen K, Kristensen SD, Lancellotti P, Mehilli J, Merkely B, Montalescot G, Neumann FJ, Neyes L, Perk J, Roffi M, Romeo F, Ruda M, Swahn E, Valgimigli M, Vrints CJ, Widimsky P. ESC Guidelines for the management of acute coronary syndromes in patients presenting without persistent ST-segment elevation: The Task Force for the management of acute coronary syndromes (ACS) in patients presenting without persistent ST-segment elevation of the European Society of Cardiology (ESC). *Eur Heart J* 2011;**32**:2999–3054.
11. Libby P, Ridker PM, Hansson GK. Progress and challenges in translating the biology of atherosclerosis. *Nature* 2011;**473**:317–325.
12. Moore KJ, Tabas I. Macrophages in the pathogenesis of atherosclerosis. *Cell* 2011;**145**:341–355.
13. Tabas I, Williams KJ, Boren J. Subendothelial lipoprotein retention as the initiating process in atherosclerosis: update and therapeutic implications. *Circulation* 2007;**116**:1832–1844.
14. Gomez D, Owens GK. Smooth muscle cell phenotypic switching in atherosclerosis. *Cardiovasc Res* 2012;**95**:156–164.
15. Stary HC, Blankenhorn DH, Chandler AB, Glagov S, Insull W Jr, Richardson M, Rosenfeld ME, Schaffer SA, Schwartz CJ, Wagner WD, Wissler RW. A definition of the intima of human arteries and of its atherosclerosis-prone regions. A report from the Committee on Vascular Lesions of the Council on Arteriosclerosis, American Heart Association. *Circulation* 1992;**85**:391–405.
16. Chatzizisis IS, Coskun AU, Jonas M, Edelman ER, Feldman CL, Stone PH. Role of endothelial shear stress in the natural history of coronary atherosclerosis and vascular remodeling: molecular, cellular, and vascular behavior. *J Am Coll Cardiol* 2007;**49**:2379–2393.
17. Wald NJ, Morris JK, Rish S. The efficacy of combining several risk factors as a screening test. *J Med Screen* 2005;**12**:197–201.
18. Ware JH. The limitations of risk factors as prognostic tools. *N Engl J Med* 2006;**355**:2615–2617.
19. Chapman I. Morphogenesis of occluding coronary artery thrombosis. *Arch Pathol* 1965;**80**:256–261.
20. Constantinides P. Plaque fissures in human coronary thrombosis. *J Atheroscler Res* 1966;**6**:1–17.
21. Friedman M, Van den Bovenkamp GJ. The pathogenesis of a coronary thrombus. *Am J Pathol* 1966;**48**:19–44.
22. Bouch DC, Montgomery GL. Cardiac lesions in fatal cases of recent myocardial ischaemia from a coronary care unit. *Br Heart J* 1970;**32**:795–803.
23. Sinapius D. Relationship between coronary-artery thrombosis and myocardial infarction. *Dtsch Med Wochenschr* 1972;**97**:443–448.
24. Friedman M, Manwaring JH, Rosenman RH, Donlon G, Ortega P, Grube SM. Instantaneous and sudden deaths. Clinical and pathological differentiation in coronary artery disease. *JAMA* 1973;**225**:1319–1328.
25. Horie T, Sekiguchi M, Hirokawa K. Coronary thrombosis in pathogenesis of acute myocardial infarction. Histopathological study of coronary arteries in 108 necropsied cases using serial section. *Br Heart J* 1978;**40**:153–161.
26. Falk E. Plaque rupture with severe pre-existing stenosis precipitating coronary thrombosis. Characteristics of coronary atherosclerotic plaques underlying fatal occlusive thrombi. *Br Heart J* 1983;**50**:127–134.
27. Tracy RE, Devaney K, Kissling G. Characteristics of the plaque under a coronary thrombus. *Virchows Arch A Pathol Anat Histopathol* 1985;**405**:411–427.
28. el Fawal MA, Berg GA, Wheatley DJ, Harland WA. Sudden coronary death in Glasgow: nature and frequency of acute coronary lesions. *Br Heart J* 1987;**57**: 329–335.
29. Yutani C, Ishibashi-Ueda H, Konishi M, Shibata J, Arita M. Histopathological study of acute myocardial infarction and pathoetiology of coronary thrombosis: a comparative study in four districts in Japan. *Jpn Circ J* 1987;**51**:352–361.
30. Richardson PD, Davies MJ, Born GV. Influence of plaque configuration and stress distribution on fissuring of coronary atherosclerotic plaques. *Lancet* 1989;**2**: 941–944.
31. van der Wal AC, Becker AE, van der Loos CM, Das PK. Site of intimal rupture or erosion of thrombosed coronary atherosclerotic plaques is characterized by an inflammatory process irrespective of the dominant plaque morphology. *Circulation* 1994;**89**:36–44.
32. Davies MJ. The composition of coronary-artery plaques. *N Engl J Med* 1997;**336**: 1312–1314.
33. Arbustini E, Dal Bello B, Morbini P, Burke AP, Bocciaelli M, Specchia G, Virmani R. Plaque erosion is a major substrate for coronary thrombosis in acute myocardial infarction. *Heart* 1999;**82**:269–272.
34. Shi H, Wei L, Yang T, Wang S, Li X, You L. Morphometric and histological study of coronary plaques in stable angina and acute myocardial infarctions. *Chin Med J (Engl)* 1999;**112**:1040–1043.
35. Kojima S, Nonogi H, Miyao Y, Miyazaki S, Goto Y, Itoh A, Daikoku S, Matsumoto T, Morii I, Yutani C. Is preinfarction angina related to the presence or absence of coronary plaque rupture? *Heart* 2000;**83**:64–68.
36. Virmani R, Kolodgie FD, Burke AP, Farb A, Schwartz SM. Lessons from sudden coronary death: a comprehensive morphological classification scheme for atherosclerotic lesions. *Arterioscler Thromb Vasc Biol* 2000;**20**:1262–1275.
37. Murai T, Baba M, Ro A, Murai N, Matsuo Y, Takada A, Saito K. Sudden death due to cardiovascular disorders: a review of the studies on the medico-legal cases in Tokyo. *Keio J Med* 2001;**50**:175–181.
38. Michalodimitrakakis M, Mavroforou A, Giannoukas AD. Lessons learnt from the autopsies of 445 cases of sudden cardiac death in adults. *Coron Artery Dis* 2005;**16**:385–389.
39. Sato Y, Hatakeyama K, Marutsuka K, Asada Y. Incidence of asymptomatic coronary thrombosis and plaque disruption: comparison of non-cardiac and cardiac deaths among autopsy cases. *Thromb Res* 2009;**124**:19–23.
40. Subirana MT, Juan-Babot JO, Puig T, Lucena J, Rico A, Salguero M, Borondo JC, Ordóñez J, Arimany J, Vazquez R, Badimon L, Thiene G, de Luna AB. Specific characteristics of sudden death in a mediterranean Spanish population. *Am J Cardiol* 2011;**107**:622–627.
41. Falk E. Pathogenesis of atherosclerosis. *J Am Coll Cardiol* 2006;**47**:C7–C12.
42. Falk E, Shah PK, Fuster V. Coronary plaque disruption. *Circulation* 1995;**92**: 657–671.
43. Stary HC, Chandler AB, Dinsmore RE, Fuster V, Glagov S, Insull W Jr, Rosenfeld ME, Schwartz CJ, Wagner WD, Wissler RW. A definition of advanced types of atherosclerotic lesions and a histological classification of atherosclerosis. A report from the Committee on Vascular Lesions of the Council on Arteriosclerosis, American Heart Association. *Circulation* 1995;**92**:1355–1374.
44. Burke AP, Virmani R, Galis Z, Haudenschild CC, Muller JE. 34th Bethesda Conference: Task force #2—What is the pathologic basis for new atherosclerosis imaging techniques? *J Am Coll Cardiol* 2003;**41**:1874–1886.
45. Schaar JA, Muller JE, Falk E, Virmani R, Fuster V, Serruys PW, Colombo A, Stefanadis C, Ward Casscells S, Moreno PR, Maseri A, van der Steen AF. Terminology for high-risk and vulnerable coronary artery plaques. Report of a meeting on the vulnerable plaque, June 17 and 18, 2003, Santorini, Greece. *Eur Heart J* 2004;**25**:1077–1082.
46. Davies MJ, Thomas AC. Plaque fissuring—the cause of acute myocardial infarction, sudden ischaemic death, and crescendo angina. *Br Heart J* 1985;**53**: 363–373.
47. Kubo T, Imanishi T, Takarada S, Kuroi A, Ueno S, Yamano T, Tanimoto T, Matsuo Y, Masho T, Kitabata H, Tsuda K, Tomobuchi Y, Akasaka T. Assessment of culprit lesion morphology in acute myocardial infarction: ability of optical coherence tomography compared with intravascular ultrasound and coronary angiography. *J Am Coll Cardiol* 2007;**50**:933–939.
48. Davies MJ, Bland JM, Hangartner JR, Angelini A, Thomas AC. Factors influencing the presence or absence of acute coronary artery thrombi in sudden ischaemic death. *Eur Heart J* 1989;**10**:203–208.
49. Frink RJ. Chronic ulcerated plaques: new insights into the pathogenesis of acute coronary disease. *J Invasive Cardiol* 1994;**6**:173–185.
50. Mann J, Davies MJ. Mechanisms of progression in native coronary artery disease: role of healed plaque disruption. *Heart* 1999;**82**:265–268.
51. Burke AP, Kolodgie FD, Farb A, Weber DK, Malcom GT, Smialek J, Virmani R. Healed plaque ruptures and sudden coronary death: evidence that subclinical rupture has a role in plaque progression. *Circulation* 2001;**103**:934–940.
52. Ambrose JA, Tannenbaum MA, Alexopoulos D, Hjemdahl-Monsen CE, Leavy J, Weiss M, Borrico S, Gorlin R, Fuster V. Angiographic progression of coronary artery disease and the development of myocardial infarction. *J Am Coll Cardiol* 1988;**12**:56–62.
53. Kaski JC, Chen L, Chester M. Rapid angiographic progression of ‘target’ and ‘nontarget’ stenoses in patients awaiting coronary angioplasty. *J Am Coll Cardiol* 1995;**26**:416–421.



54. Chen L, Chester MR, Redwood S, Huang J, Leatham E, Kaski JC. Angiographic stenosis progression and coronary events in patients with 'stabilized' unstable angina. *Circulation* 1995;**91**:2319–2324.
55. Chester MR, Chen L, Tousoulis D, Poloniecki J, Kaski JC. Differential progression of complex and smooth stenoses within the same coronary tree in men with stable coronary artery disease. *J Am Coll Cardiol* 1995;**25**:837–842.
56. Farb A, Burke AP, Tang AL, Liang TY, Mannan P, Smialek J, Virmani R. Coronary plaque erosion without rupture into a lipid core. A frequent cause of coronary thrombosis in sudden coronary death. *Circulation* 1996;**93**:1354–1363.
57. Davies MJ. A macro and micro view of coronary vascular insult in ischemic heart disease. *Circulation* 1990;**82**(3 Suppl.):II38–II46.
58. Lee JB, Mintz GS, Lissauskas JB, Biro SG, Pu J, Sum ST, Madden SP, Burke AP, Goldstein J, Stone GW, Virmani R, Muller JE, Maehara A. Histopathologic validation of the intravascular ultrasound diagnosis of calcified coronary artery nodules. *Am J Cardiol* 2011;**108**:1547–1551.
59. Xu Y, Mintz GS, Tam A, McPherson JA, Iniguez A, Fajadet J, Fahy M, Weisz G, De Bruyne B, Serruys PW, Stone GW, Maehara A. Prevalence, distribution, predictors, and outcomes of patients with calcified nodules in native coronary arteries: a three-vessel intravascular ultrasound analysis from PROSPECT. *Circulation* 2012;**126**:537–545.
60. Falk E, Shah PK. Pathogenesis of atherothrombosis: role of vulnerable, ruptured and eroded plaques. In: Fuster V, Topol EJ, Nabel EG, eds. *Atherothrombosis and Coronary Artery Disease*. 2nd ed. Philadelphia: Lippincott Williams & Wilkins; 2005.
61. Burke AP, Farb A, Malcom GT, Liang Y, Smialek J, Virmani R. Effect of risk factors on the mechanism of acute thrombosis and sudden coronary death in women. *Circulation* 1998;**97**:2110–2116.
62. Bottcher M, Falk E. Pathology of the coronary arteries in smokers and non-smokers. *J Cardiovasc Risk* 1999;**6**:299–302.
63. Ferrante G, Nakano M, Prati F, Niccoli G, Mallus MT, Ramazzotti V, Montone RA, Kolodgie FD, Virmani R, Crea F. High levels of systemic myeloperoxidase are associated with coronary plaque erosion in patients with acute coronary syndromes: a clinicopathological study. *Circulation* 2010;**122**:2505–2513.
64. Avanzas P, Arroyo-Espiguero R, Cosin-Sales J, Aldama G, Pizzi C, Quiles J, Kaski JC. Markers of inflammation and multiple complex stenoses (pancoronary plaque vulnerability) in patients with non-ST segment elevation acute coronary syndromes. *Heart* 2004;**90**:847–852.
65. Cosin-Sales J, Christiansen M, Kaminski P, Oxvig C, Overgaard MT, Cole D, Holt DW, Kaski JC. Pregnancy-associated plasma protein A and its endogenous inhibitor, the proform of eosinophil major basic protein (proMBP), are related to complex stenosis morphology in patients with stable angina pectoris. *Circulation* 2004;**109**:1724–1728.
66. Kolodgie FD, Burke AP, Farb A, Gold HK, Yuan J, Narula J, Finn AV, Virmani R. The thin-cap fibroatheroma: a type of vulnerable plaque: the major precursor lesion to acute coronary syndromes. *Curr Opin Cardiol* 2001;**16**:285–292.
67. Kolodgie FD, Burke AP, Skorija KS, Ladich E, Kutys R, Makuria AT, Virmani R. Lipoprotein-associated phospholipase A2 protein expression in the natural progression of human coronary atherosclerosis. *Arterioscler Thromb Vasc Biol* 2006;**26**:2523–2529.
68. Thim T, Hagensen MK, Bentzon JF, Falk E. From vulnerable plaque to atherothrombosis. *J Intern Med* 2008;**263**:506–516.
69. Ozaki Y, Okumura M, Ismail TF, Motoyama S, Naruse H, Hattori K, Kawai H, Sarai M, Takagi Y, Ishii J, Anno H, Virmani R, Serruys PW, Narula J. Coronary CT angiographic characteristics of culprit lesions in acute coronary syndromes not related to plaque rupture as defined by optical coherence tomography and angioscopy. *Eur Heart J* 2011;**32**:2814–2823.
70. Kubo T, Matsuo Y, Ino Y, Tanimoto T, Ishibashi K, Komukai K, Kitabata H, Tanaka A, Kimura K, Imanishi T, Akasaka T. Optical coherence tomography analysis of attenuated plaques detected by intravascular ultrasound in patients with acute coronary syndromes. *Cardiol Res Pract* 2011;**2011**:687515.
71. Takano M, Kitamura M, Inami T, Seino Y, Mizuno K. Acute coronary syndrome without optical coherence tomography identification of plaque disruption: Is this plaque erosion?. *Int J Cardiol* 2012.
72. Cheruvu PK, Finn AV, Gardner C, Caplan J, Goldstein J, Stone GW, Virmani R, Muller JE. Frequency and distribution of thin-cap fibroatheroma and ruptured plaques in human coronary arteries: a pathologic study. *J Am Coll Cardiol* 2007;**50**:940–949.
73. Wang JC, Normand SL, Mauri L, Kuntz RE. Coronary artery spatial distribution of acute myocardial infarction occlusions. *Circulation* 2004;**110**:278–284.
74. Hong MK, Mintz GS, Lee CW, Lee BK, Yang TH, Kim YH, Song JM, Han KH, Kang DH, Cheong SS, Song JK, Kim JJ, Park SW, Park SJ. The site of plaque rupture in native coronary arteries: a three-vessel intravascular ultrasound analysis. *J Am Coll Cardiol* 2005;**46**:261–265.
75. Waxman S, Ishibashi F, Muller JE. Detection and treatment of vulnerable plaques and vulnerable patients: novel approaches to prevention of coronary events. *Circulation* 2006;**114**:2390–2411.
76. Guyton JR. Phospholipid hydrolytic enzymes in a 'cesspool' of arterial intimal lipoproteins: a mechanism for atherogenic lipid accumulation. *Arterioscler Thromb Vasc Biol* 2001;**21**:884–886.
77. Nakashima Y, Fujii H, Sumiyoshi S, Wight TN, Sueishi K. Early human atherosclerosis: accumulation of lipid and proteoglycans in intimal thickenings followed by macrophage infiltration. *Arterioscler Thromb Vasc Biol* 2007;**27**:1159–1165.
78. Kolodgie FD, Burke AP, Nakazawa G, Virmani R. Is pathologic intimal thickening the key to understanding early plaque progression in human atherosclerotic disease? *Arterioscler Thromb Vasc Biol* 2007;**27**:986–989.
79. Moreno PR, Falk E, Palacios IF, Newell JB, Fuster V, Fallon JT. Macrophage infiltration in acute coronary syndromes. Implications for plaque rupture. *Circulation* 1994;**90**:775–778.
80. van der Wal AC, Becker AE, Koch KT, Piek JJ, Teeling P, van der Loos CM, David GK. Clinically stable angina pectoris is not necessarily associated with histologically stable atherosclerotic plaques. *Heart* 1996;**76**:312–316.
81. Shah PK, Falk E, Badimon JJ, Fernandez-Ortiz A, Mailhac A, Villareal-Levy G, Fallon JT, Regnstrom J, Fuster V. Human monocyte-derived macrophages induce collagen breakdown in fibrous caps of atherosclerotic plaques. Potential role of matrix-degrading metalloproteinases and implications for plaque rupture. *Circulation* 1995;**92**:1565–1569.
82. Kovanen PT. Mast cells in atherogenesis: actions and reactions. *Curr Atheroscler Rep* 2009;**11**:214–219.
83. Bjorkerud S, Bjorkerud B. Apoptosis is abundant in human atherosclerotic lesions, especially in inflammatory cells (macrophages and T cells), and may contribute to the accumulation of gruel and plaque instability. *Am J Pathol* 1996;**149**:367–380.
84. Kolodgie FD, Narula J, Burke AP, Haider N, Farb A, Hui-Liang Y, Smialek J, Virmani R. Localization of apoptotic macrophages at the site of plaque rupture in sudden coronary death. *Am J Pathol* 2000;**157**:1259–1268.
85. Schwartz SM, Virmani R, Rosenfeld ME. The good smooth muscle cells in atherosclerosis. *Curr Atheroscler Rep* 2000;**2**:422–429.
86. Libby P. Inflammation in atherosclerosis. *Nature* 2002;**420**:868–874.
87. Hansson GK. Inflammation, atherosclerosis, and coronary artery disease. *N Engl J Med* 2005;**352**:1685–1695.
88. Joshi FR, Lindsay AC, Obaid DR, Falk E, Rudd JH. Non-invasive imaging of atherosclerosis. *Eur Heart J Cardiovasc Imaging* 2012;**13**:205–218.
89. Mann JM, Davies MJ. Vulnerable plaque. Relation of characteristics to degree of stenosis in human coronary arteries. *Circulation* 1996;**94**:928–931.
90. Kolodgie FD, Gold HK, Burke AP, Fowler DR, Kruth HS, Weber DK, Farb A, Guerrero LJ, Hayase M, Kutys R, Narula J, Finn AV, Virmani R. Intraplaque hemorrhage and progression of coronary atheroma. *N Engl J Med* 2003;**349**:2316–2325.
91. Tziakas DN, Kaski JC, Chalikias GK, Romero C, Fredericks S, Tentes IK, Kortsaris AX, Hatseras DI, Holt DW. Total cholesterol content of erythrocyte membranes is increased in patients with acute coronary syndrome: a new marker of clinical instability? *J Am Coll Cardiol* 2007;**49**:2081–2089.
92. Moreno PR, Purushothaman KR, Sirol M, Levy AP, Fuster V. Neovascularization in human atherosclerosis. *Circulation* 2006;**113**:2245–2252.
93. Barger AC, Beuwwkes R III, Lainey LL, Silverman KJ. Hypothesis: vasa vasorum and neovascularization of human coronary arteries. A possible role in the pathophysiology of atherosclerosis. *N Engl J Med* 1984;**310**:175–177.
94. Kumamoto M, Nakashima Y, Sueishi K. Intimal neovascularization in human coronary atherosclerosis: its origin and pathophysiological significance. *Hum Pathol* 1995;**26**:450–456.
95. Zhang Y, Cliff WJ, Schoeffl GI, Higgins G. Immunohistochemical study of intimal microvessels in coronary atherosclerosis. *Am J Pathol* 1993;**143**:164–172.
96. Sluimer JC, Kolodgie FD, Bijnens AP, Maxfield K, Pacheco E, Kutys B, Duimel H, Frederik PM, van Hinsbergh VV, Virmani R, Daemen MJ. Thin-walled microvessels in human coronary atherosclerotic plaques show incomplete endothelial junctions relevance of compromised structural integrity for intraplaque microvascular leakage. *J Am Coll Cardiol* 2009;**53**:1517–1527.
97. Sluimer JC, Daemen MJ. Novel concepts in atherogenesis: angiogenesis and hypoxia in atherosclerosis. *J Pathol* 2009;**218**:7–29.
98. Finn AV, Nakano M, Polavarapu R, Karmali V, Saied O, Zhao X, Yazdani S, Otsuka F, Davis T, Habib A, Narula J, Kolodgie FD, Virmani R. Hemoglobin directs macrophage differentiation and prevents foam cell formation in human atherosclerotic plaques. *J Am Coll Cardiol* 2012;**59**:166–177.
99. Bouhrel MA, Derudas B, Rigamonti E, Dievart R, Brozek J, Haulon S, Zawadzki C, Jude B, Torpier G, Marx N, Staels B, Chinetti-Gbaguidi G. PPARgamma activation primes human monocytes into alternative M2 macrophages with anti-inflammatory properties. *Cell Metab* 2007;**6**:137–143.

100. Boyle JJ, Harrington HA, Piper E, Elderfield K, Stark J, Landis RC, Haskard DO. Coronary intraplate hemorrhage evokes a novel atheroprotective macrophage phenotype. *Am J Pathol* 2009;**174**:1097–1108.
101. Fishbein MC. The vulnerable and unstable atherosclerotic plaque. *Cardiovasc Pathol* 2010;**19**:6–11.
102. Varnava AM, Mills PG, Davies MJ. Relationship between coronary artery remodeling and plaque vulnerability. *Circulation* 2002;**105**:939–943.
103. Smits PC, Pasterkamp G, Quarles van Ufford MA, Eefting FD, Stella PR, de Jaegere PP, Borst C. Coronary artery disease: arterial remodeling and clinical presentation. *Heart* 1999;**82**:461–464.
104. Nicholls SJ, Tuzcu EM, Kalidindi S, Woloski K, Moon KW, Sipahi I, Schoenhagen P, Nissen SE. Effect of diabetes on progression of coronary atherosclerosis and arterial remodeling: a pooled analysis of 5 intravascular ultrasound trials. *J Am Coll Cardiol* 2008;**52**:255–262.
105. Bolick LE, Blankenhorn DH. A quantitative study of coronary arterial calcification. *Am J Pathol* 1961;**39**:511–519.
106. Sangiorgi G, Rumberger JA, Severson A, Edwards WD, Gregoire J, Fitzpatrick LA, Schwartz RS. Arterial calcification and not lumen stenosis is highly correlated with atherosclerotic plaque burden in humans: a histologic study of 723 coronary artery segments using nondecalcifying methodology. *J Am Coll Cardiol* 1998;**31**:126–133.
107. Burke AP, Weber DK, Kolodgie FD, Farb A, Taylor AJ, Virmani R. Pathophysiology of calcium deposition in coronary arteries. *Herz* 2001;**26**:239–244.
108. Vengrenyuk Y, Carlier S, Xanthos S, Cardoso L, Ganatos P, Virmani R, Einav S, Gilchrist L, Weinbaum S. A hypothesis for vulnerable plaque rupture due to stress-induced debonding around cellular microcalcifications in thin fibrous caps. *Proc Natl Acad Sci USA* 2006;**103**:14678–14683.
109. Lachman AS, Spray TL, Kerwin DM, Shugoll GI, Roberts WC. Medial calcinosis of Monckeberg. A review of the problem and a description of a patient with involvement of peripheral, visceral and coronary arteries. *Am J Med* 1977;**63**:615–622.
110. Beckman JA, Ganz J, Creager MA, Ganz P, Kinlay S. Relationship of clinical presentation and calcification of culprit coronary artery stenoses. *Arterioscler Thromb Vasc Biol* 2001;**21**:1618–1622.
111. Ehara S, Kobayashi Y, Yoshiyama M, Shimada K, Shimada Y, Fukuda D, Nakamura Y, Yamashita H, Yamagishi H, Takeuchi K, Naruko T, Haze K, Becker AE, Yoshikawa J, Ueda M. Spotty calcification typifies the culprit plaque in patients with acute myocardial infarction: an intravascular ultrasound study. *Circulation* 2004;**110**:3424–3429.
112. Motoyama S, Sarai M, Harigaya H, Anno H, Inoue K, Hara T, Naruse H, Ishii J, Hishida H, Wong ND, Virmani R, Kondo T, Ozaki Y, Narula J. Computed tomographic angiography characteristics of atherosclerotic plaques subsequently resulting in acute coronary syndrome. *J Am Coll Cardiol* 2009;**54**:49–57.
113. Pfleiderer T, Marwan M, Schepis T, Ropers D, Seltmann M, Muschiot G, Daniel WG, Achenbach S. Characterization of culprit lesions in acute coronary syndromes using coronary dual-source CT angiography. *Atherosclerosis* 2010;**211**:437–444.
114. Greenland P, Bonow RO, Brundage BH, Budoff MJ, Eisenberg MJ, Grundy SM, Lauer MS, Post WS, Raggi P, Redberg RF, Rodgers GP, Shaw LJ, Taylor AJ, Weintraub WS, Harrington RA, Abrams J, Anderson JL, Bates ER, Grines CL, Hlatky MA, Lichtenberg RC, Lindner JR, Pohost GM, Schofield RS, Shuburooks SJ Jr, Stein JH, Tracy CM, Vogel RA, Wesley DJ. ACCF/AHA 2007 clinical expert consensus document on coronary artery calcium scoring by computed tomography in global cardiovascular risk assessment and in evaluation of patients with chest pain: a report of the American College of Cardiology Foundation Clinical Expert Consensus Task Force (ACCF/AHA Writing Committee to Update the 2000 Expert Consensus Document on Electron Beam Computed Tomography). *Circulation* 2007;**115**:402–426.
115. Stone GW, Maehara A, Lansky AJ, de Bruyne B, Cristea E, Mintz GS, Mehran R, McPherson J, Farhat N, Marso SP, Parise H, Templin B, White R, Zhang Z, Serruys PW. A prospective natural-history study of coronary atherosclerosis. *N Engl J Med* 2011;**364**:226–235.
116. Falk E, Wilensky RL. Prediction of coronary events by intravascular imaging. *JACC Cardiovasc Imaging* 2012;**5** (3 Suppl):S38–S41.
117. Ambrose JA. In search of the 'vulnerable plaque': can it be localized and will focal regional therapy ever be an option for cardiac prevention? *J Am Coll Cardiol* 2008;**51**:1539–1542.
118. Finn AV, Nakano M, Narula J, Kolodgie FD, Virmani R. Concept of vulnerable/unstable plaque. *Arterioscler Thromb Vasc Biol* 2010;**30**:1282–1292.
119. Mittleman MA, Mostofsky E. Physical, psychological and chemical triggers of acute cardiovascular events: preventive strategies. *Circulation* 2011;**124**:346–354.
120. Hallqvist J, Moller J, Ahlbom A, Diderichsen F, Reuterwall C, de Faire U. Does heavy physical exertion trigger myocardial infarction? A case-crossover analysis nested in a population-based case-referent study. *Am J Epidemiol* 2000;**151**:459–467.
121. Burke AP, Farb A, Malcom GT, Liang Y, Smialek JE, Virmani R. Plaque rupture and sudden death related to exertion in men with coronary artery disease. *JAMA* 1999;**281**:921–926.
122. Falk E. Unstable angina with fatal outcome: dynamic coronary thrombosis leading to infarction and/or sudden death. Autopsy evidence of recurrent mural thrombosis with peripheral embolization culminating in total vascular occlusion. *Circulation* 1985;**71**:699–708.
123. Falk E. Dynamics in thrombus formation. *Ann NY Acad Sci* 1992;**667**:204–223.
124. Maseri A, L'Abbate A, Baroldi G, Chierchia S, Marzilli M, Ballestra AM, Severi S, Parodi O, Biagini A, Distanti A, Pesola A. Coronary vasospasm as a possible cause of myocardial infarction. A conclusion derived from the study of 'preinfarction' angina. *N Engl J Med* 1978;**299**:1271–1277.
125. Ambrose JA, Winters SL, Arora RR, Haft JJ, Goldstein J, Rentrop KP, Gorlin R, Fuster V. Coronary angiographic morphology in myocardial infarction: a link between the pathogenesis of unstable angina and myocardial infarction. *J Am Coll Cardiol* 1985;**6**:1233–1238.
126. Kaski JC, Chester MR, Chen L, Katritsis D. Rapid angiographic progression of coronary artery disease in patients with angina pectoris. The role of complex stenosis morphology. *Circulation* 1995;**92**:2058–2065.
127. DeWood MA, Spores J, Notske R, Mouser LT, Burroughs R, Golden MS, Lang HT. Prevalence of total coronary occlusion during the early hours of transmural myocardial infarction. *N Engl J Med* 1980;**303**:897–902.
128. DeWood MA, Stifter WF, Simpson CS, Spores J, Eugster GS, Judge TP, Hinnen ML. Coronary arteriographic findings soon after non-Q-wave myocardial infarction. *N Engl J Med* 1986;**315**:417–423.
129. Falk E. Coronary thrombosis: pathogenesis and clinical manifestations. *Am J Cardiol* 1991;**68**:288–358.
130. Fernandez-Ortiz A, Badimon JJ, Falk E, Fuster V, Meyer B, Mailhac A, Weng D, Shah PK, Badimon L. Characterization of the relative thrombogenicity of atherosclerotic plaque components: implications for consequences of plaque rupture. *J Am Coll Cardiol* 1994;**23**:1562–1569.
131. Ardisino D, Merlini PA, Ariens R, Coppola R, Bramucci E, Mannucci PM. Tissue-factor antigen and activity in human coronary atherosclerotic plaques. *Lancet* 1997;**349**:769–771.
132. Rautou PE, Vion AC, Amabile N, Chironi G, Simon A, Tedgui A, Boulanger CM. Microparticles, vascular function, and atherothrombosis. *Circ Res* 2011;**109**:593–606.
133. Ruggeri ZM. Platelets in atherothrombosis. *Nat Med* 2002;**8**:1227–1234.
134. Falk E, Thuesen L. Pathology of coronary microembolisation and no reflow. *Heart* 2003;**89**:983–985.
135. Bogaty P, Hackett D, Davies G, Maseri A. Vasoreactivity of the culprit lesion in unstable angina. *Circulation* 1994;**90**:5–11.
136. Davies MJ, Thomas AC, Knapman PA, Hangartner JR. Intramyocardial platelet aggregation in patients with unstable angina suffering sudden ischemic cardiac death. *Circulation* 1986;**73**:418–427.
137. Schwartz RS, Burke A, Farb A, Kaye D, Lesser JR, Henry TD, Virmani R. Microemboli and microvascular obstruction in acute coronary thrombosis and sudden coronary death: relation to epicardial plaque histopathology. *J Am Coll Cardiol* 2009;**54**:2167–2173.
138. Lauer MS. Primary prevention of atherosclerotic cardiovascular disease: the high public burden of low individual risk. *JAMA* 2007;**297**:1376–1378.
139. Falk E, Shah PK. The SHAPE guideline: ahead of its time or just in time? *Curr Atheroscler Rep* 2011;**13**:345–352.
140. Manolio TA. Genomewide association studies and assessment of the risk of disease. *N Engl J Med* 2010;**363**:166–176.
141. Ripatti S, Tikkanen E, Orho-Melander M, Havulinna AS, Silander K, Sharma A, Guiducci C, Perola M, Jula A, Sinisalo J, Lokki ML, Nieminen MS, Melander O, Salomaa V, Peltonen L, Kathiresan S. A multilocus genetic risk score for coronary heart disease: case-control and prospective cohort analyses. *Lancet* 2010;**376**:1393–1400.
142. Sillesen H, Falk E. Why not screen for subclinical atherosclerosis? *Lancet* 2011;**378**:645–646.
143. Greenland P, Alpert JS, Beller GA, Benjamin EJ, Budoff MJ, Fayad ZA, Foster E, Hlatky MA, Hodgson JM, Kushner FG, Lauer MS, Shaw LJ, Smith SC Jr, Taylor AJ, Weintraub WS, Wenger NK, Jacobs AK, Anderson JL, Albert N, Buller CE, Creager MA, Ettinger SM, Guyton RA, Halperin JL, Hochman JS, Nishimura R, Ohman EM, Page RL, Stevenson WG, Tarkington LG, Yancy CW. 2010 ACCF/AHA guideline for assessment of cardiovascular risk in asymptomatic adults: a report of the American College of Cardiology Foundation/American Heart Association Task Force on Practice Guidelines. *J Am Coll Cardiol* 2010;**56**:e50–103.
144. Perk J, De Backer G, Gohlke H, Graham I, Reiner Z, Verschuren M, Albus C, Benlian P, Boysen G, Cifkova R, Deaton C, Ebrahim S, Fisher M, Germano G, Hobbs R, Hoes A, Karadeniz S, Mezzani A, Prescott E, Ryden L, Scherer M, Syvanne M, Scholte op Reimer WJ, Vrints C, Wood D, Zamorano JL.

- Zannad F. European Guidelines on cardiovascular disease prevention in clinical practice (version 2012). The Fifth Joint Task Force of the European Society of Cardiology and Other Societies on Cardiovascular Disease Prevention in Clinical Practice (constituted by representatives of nine societies and by invited experts). Developed with the special contribution of the European Association for Cardiovascular Prevention & Rehabilitation (EACPR). *Eur Heart J* 2012;**33**: 1635–1701.
145. Polonsky TS, McClelland RL, Jorgensen NW, Bild DE, Burke GL, Guerci AD, Greenland P. Coronary artery calcium score and risk classification for coronary heart disease prediction. *JAMA* 2010;**303**:1610–1616.
  146. Erbel R, Mohlenkamp S, Moebus S, Schmermund A, Lehmann N, Stang A, Dragano N, Gronemeyer D, Seibel R, Kalsch H, Brocker-Preuss M, Mann K, Siegrist J, Jockel KH. Coronary risk stratification, discrimination, and reclassification improvement based on quantification of subclinical coronary atherosclerosis: the Heinz Nixdorf Recall study. *J Am Coll Cardiol* 2010;**56**: 1397–1406.
  147. Erbel R, Budoff M. Improvement of cardiovascular risk prediction using coronary imaging: subclinical atherosclerosis: the memory of lifetime risk factor exposure. *Eur Heart J* 2012;**33**:1201–1213.
  148. Blaha MJ, Budoff MJ, DeFilippis AP, Blankstein R, Rivera JJ, Agatston A, O'Leary DH, Lima J, Blumenthal RS, Nasir K. Associations between C-reactive protein, coronary artery calcium, and cardiovascular events: implications for the JUPITER population from MESA, a population-based cohort study. *Lancet* 2011;**378**:684–692.
  149. Narula J, Garg P, Achenbach S, Motoyama S, Virmani R, Strauss HW. Arithmetic of vulnerable plaques for noninvasive imaging. *Nat Clin Pract Cardiovasc Med* 2008;**5**(Suppl. 2):S2–10.
  150. Rudd JH, Narula J, Strauss HW, Virmani R, Machac J, Klimas M, Tahara N, Fuster V, Warburton EA, Fayad ZA, Tawakol AA. Imaging atherosclerotic plaque inflammation by fluorodeoxyglucose with positron emission tomography: ready for prime time? *J Am Coll Cardiol* 2010;**55**:2527–2535.
  151. Camici PG, Rimoldi OE, Gaemperli O, Libby P. Non-invasive anatomic and functional imaging of vascular inflammation and unstable plaque. *Eur Heart J* 2012;**33**: 1309–1317.
  152. Gallino A, Stuber M, Crea F, Falk E, Corti R, Lekakis J, Schwitter J, Camici P, Gaemperli O, Di Valentino M, Prior J, Garcia-Garcia HM, Vlachopoulos C, Cosentino F, Windecker S, Pedrazzini G, Conti R, Mach F, De Caterina R, Libby P. 'In vivo' imaging of atherosclerosis. *Atherosclerosis* 2012;**224**:25–36.
